# Supplementary material for: Potential role of nuclear PD-L1 expression in cell-surface vimentin positive circulating tumor cells as a prognostic marker in cancer patients
Source: PubMed Central journal article supplement (PMC4929464; doi:10.1038/srep28910), 2016-07-01
Supplement: srep28910-s1.pdf [file srep28910-s1.pdf]

**Potential role of nuclear PD-L1 expression in cell-surface vimentin positive circulating tumor cells as a prognostic marker in cancer patients**

**Arun Satelli<sup>1</sup>, Izhar Singh Batth<sup>1</sup>, Zachary Brownlee<sup>1</sup>, Christina Rojas<sup>1</sup>, Qing H. Meng<sup>2</sup>, Scott Kopetz<sup>3</sup> & Shulin Li<sup>1,4,\*</sup>**

<sup>1</sup>Department of Pediatrics, The University of Texas MD Anderson Cancer Center, Houston, Texas. <sup>2</sup>Department of Laboratory Medicine, The University of Texas MD Anderson Cancer Center, Houston, Texas. <sup>3</sup>Departments of Surgical Oncology and Molecular and Cellular Oncology, The University of Texas MD Anderson Cancer Center, Houston, Texas. <sup>4</sup>The University of Texas Graduate School of Biomedical Sciences, Houston, Texas. \*Correspondence and requests for materials should be addressed to S.L. (sli4@mdanderson.org)

Short Title: Nuclear PDL-1 in circulating tumor cells

Keywords: PD-L1, Vimentin, CTC, Colon cancer, Prostate cancer

**Supplementary Table S1. Survival durations, CTC counts, and nPD-L1 positivity in colon cancer patients.**

| Patient number | Survival duration (months) | CTC count | ≥50% positive for nPD-L1 |
|----------------|----------------------------|-----------|--------------------------|
| 1              | 3.780821918                | 5         | No                       |
| 2              | 13.11780822                | 1         | No                       |
| 3              | 11.80273973                | 2         | No                       |
| 5              | 9.60000000                 | 5         | No                       |
| 6              | 8.219178082                | 1         | No                       |
| 8              | 4.635616438                | 7         | No                       |
| 9              | 15.25479452                | 4         | No                       |
| 10             | 10.48767123                | 4         | No                       |
| 11             | 2.860273973                | 4         | No                       |
| 12             | 0.098630137                | 4         | No                       |
| 13             | 4.405479452                | 4         | No                       |
| 14             | 6.509589041                | 4         | No                       |
| 15             | 3.912328767                | 4         | Yes                      |
| 17             | 9.369863014                | 3         | No                       |
| 18             | 2.991780822                | 5         | No                       |
| 19             | 8.186301370                | 14        | No                       |
| 21             | 13.57808219                | 4         | Yes                      |
| 22             | 2.82739726                 | 2         | Yes                      |
| 23             | 6.969863014                | 2         | Yes                      |
| 25             | 1.380821918                | 6         | Yes                      |
| 26             | 1.578082192                | 2         | Yes                      |
| 27             | 7.989041096                | 4         | Yes                      |
| 28             | 2.334246575                | 20        | Yes                      |
| 29             | 5.983561644                | 5         | Yes                      |
| 30             | 2.695890411                | 3         | Yes                      |
| 31             | 4.438356164                | 3         | Yes                      |
| 32             | 3.715068493                | 4         | Yes                      |
| 33             | 0.854794521                | 17        | Yes                      |
| 35             | 9.205479452                | 6         | Yes                      |
| 36             | 1.84109589                 | 1         | Yes                      |
| 37             | 9.665753425                | 1         | Yes                      |
| 38             | 1.282191781                | 1         | Yes                      |
| 39             | 1.052054795                | 2         | Yes                      |
| 40             | 4.043835616                | 3         | Yes                      |
| 41             | 1.41369863                 | 2         | Yes                      |
| 42             | 13.38082192                | 5         | Yes                      |
| 43             | 0.756164384                | 1         | Yes                      |
| 44             | 3.879452055                | 6         | Yes                      |
| 45             | 15.81369863                | 3         | Yes                      |
| 46             | 5.128767123                | 1         | Yes                      |
| 47             | 0.854794521                | 2         | Yes                      |
| 48             | 8.18630137                 | 1         | Yes                      |
| 49             | 0.887671233                | 2         | Yes                      |
| 50             | 2.367123288                | 3         | Yes                      |
| 51             | 1.117808219                | 11        | Yes                      |
| 52             | 9.501369863                | 12        | Yes                      |
| 53             | 3.846575342                | 5         | Yes                      |
| 54             | 0.98630137                 | 3         | Yes                      |
| 55             | 6.082191781                | 2         | Yes                      |
| 56             | 2.761643836                | 1         | Yes                      |
| 58             | 4.767123288                | 8         | Yes                      |
| 59             | 16.99726027                | 10        | Yes                      |
| 60             | 0.756164384                | 3         | No                       |
| 61             | 15.81369863                | 1         | Yes                      |
| 62             | 20.02191781                | 2         | No                       |
| 63             | 15.48493151                | 2         | No                       |
| 64             | 9.073972603                | 1         | No                       |
| 65             | 12.32876712                | 2         | Yes                      |
| 66             | 4.701369863                | 2         | Yes                      |
| 67             | 17.03013699                | 12        | Yes                      |
| 70             | 1.249315068                | 9         | No                       |

**Supplementary Table S2. Survival durations, CTC counts, and nPD-L1 positivity in prostate cancer patients.**

| <b>Patient number</b> | <b>Survival duration (months)</b> | <b>CTC count</b> | <b>≥50% positive for nPDL1</b> |
|-----------------------|-----------------------------------|------------------|--------------------------------|
| P4                    | 8.284931507                       | 35               | Yes                            |
| P10                   | 4.602739726                       | 1                | Yes                            |
| P11                   | 3.189041096                       | 134              | Yes                            |
| P12                   | 9.336986301                       | 91               | Yes                            |
| P13                   | 10.38904110                       | 5                | Yes                            |
| P14                   | 4.767123288                       | 14               | Yes                            |
| P15                   | 9.731506849                       | 4                | No                             |
| P16                   | 10.42191781                       | 22               | Yes                            |
| P18                   | 7.824657534                       | 890              | Yes                            |
| P19                   | 0.032876712                       | 23               | Yes                            |
| P20                   | 9.008219178                       | 93               | Yes                            |
| P21                   | 8.876712329                       | 76               | Yes                            |
| P22                   | 9.073972603                       | 42               | Yes                            |
| P23                   | 1.249315068                       | 10               | Yes                            |
| P24                   | 5.621917808                       | 21               | Yes                            |
| P27                   | 0.690410959                       | 35               | Yes                            |
| P28                   | 1.183561644                       | 56               | Yes                            |
| P35                   | 8.613698630                       | 1                | No                             |
| P37                   | 7.002739726                       | 18               | No                             |
| P38                   | 4.405479452                       | 9                | Yes                            |
| P41                   | 3.583561644                       | 1                | No                             |
| P42                   | 8.284931507                       | 1                | No                             |
| P45                   | 7.693150685                       | 5                | Yes                            |
| P46                   | 7.561643836                       | 1                | No                             |
| P47                   | 1.183561644                       | 3                | Yes                            |
| P51                   | 7.495890411                       | 3                | No                             |
| P52                   | 6.345205479                       | 6                | Yes                            |
| P54                   | 6.147945205                       | 1                | Yes                            |
| P56                   | 19.92328767                       | 6                | Yes                            |
| P57                   | 1.775342466                       | 6                | Yes                            |
